# The *Drosophila* homolog of the putative phosphatidylserine receptor functions to inhibit apoptosis

Ronald J. Krieser<sup>1</sup>, Finola E. Moore<sup>1</sup>, Douglas Dresnek<sup>1</sup>, Brett J. Pellock<sup>1</sup>, Reena Patel<sup>1</sup>, Albert Huang<sup>1</sup>, Carrie Brachmann<sup>2</sup> and Kristin White<sup>1,\*</sup>

Exposure of phosphatidylserine is a conserved feature of apoptotic cells and is thought to act as a signal for engulfment of the cell corpse. A putative receptor for phosphatidylserine (PSR) was previously identified in mammalian systems. This receptor is proposed to function in engulfment of apoptotic cells, although gene ablation of PSR has resulted in a variety of phenotypes. We examined the role of the predicted *Drosophila* homolog of PSR (dPSR) in apoptotic cell engulfment and found no obvious role for dPSR in apoptotic cell engulfment by phagocytes in the embryo. In addition, dPSR is localized to the nucleus, inconsistent with a role in apoptotic cell recognition. However, we were surprised to find that overexpression of dPSR protects from apoptosis, while loss of *dPSR* enhances apoptosis in the developing eye. The increased apoptosis is mediated by the *head involution defective* (*Wrinkled*) gene product. In addition, our data suggest that dPSR acts through the c-Jun-NH<sub>2</sub> terminal kinase pathway to alter the sensitivity to cell death.

**KEY WORDS:** Phosphatidylserine, Engulfment, Apoptosis, *Drosophila*

## INTRODUCTION

The terminal event of apoptosis is often engulfment of the apoptotic corpse by a phagocytic neighbor or professional phagocyte. Molecular events in the apoptotic cell are important for this process, including the removal of 'don't eat me' signals, such as CD31 (Brown et al., 2002), and the exposure of 'eat me' signals, such as phosphatidylserine (PS) (Verhoven et al., 1995). PS is normally confined to the inner leaflet of the plasma membrane in living cells, but moves to the outer surface in apoptotic cells (Schlegel and Williamson, 2001). This surface alteration is conserved from *Drosophila* through mammals (van den Eijnde et al., 1998). The exposure of PS provides a recognition cue for phagocytes and is thought to drive engulfment of the apoptotic cell (Fadok et al., 1998).

A number of proteins are known to bind to PS on the surface of apoptotic cells, and some have been shown to bridge apoptotic cells to molecules on the surface of phagocytes. These bridging molecules include annexin V, annexin I, milk fat globule EGF-like protein 8 (MFG8), Developmental endothelial locus-1 (DEL-1) and growth arrest-specific 6 (GAS6) (Vermes et al., 1995; Scott et al., 2001; Hanayama et al., 2002; Arur et al., 2003; Hanayama et al., 2004).

In contrast to bridging molecules, a phagocyte receptor that directly binds PS on apoptotic cells has been described (Fadok et al., 2000). In this work, a monoclonal antibody that blocked apoptotic cell uptake in a PS-dependent manner was identified. The epitope recognized by the antibody was isolated by phage display and the gene encoding this epitope was identified as the PS receptor (PSR). PSR was predicted to be a type II membrane spanning protein. Expression of PSR in cells that normally do not engulf apoptotic cells increased their efficiency of engulfment (Fadok et al., 2000). In addition, PSR was found to have a role in the inhibition of inflammatory cytokine release after apoptotic cell engulfment

(Hoffmann et al., 2001; Huynh et al., 2002). These studies suggested that PSR might be a key regulator of the response of phagocytes to apoptotic cells.

Gene knockout models of the PSR gene in mouse (*Jmjd6* – Mouse Genome Informatics), *Caenorhabditis elegans* (*psr-1* – Wormbase) and zebrafish (*jmjd6* – ZFIN) have been reported, but these studies do not unequivocally implicate PSR in engulfment. Conflicting phenotypes have been reported from three PSR knockouts in mice (Li et al., 2003; Bose et al., 2004; Kunisaki et al., 2004). Perinatal lethality was observed in all three knockouts; however, different effects on the proliferation and differentiation of certain tissues, as well as on apoptotic cell engulfment, were observed. Defects in apoptotic cell engulfment were found in two studies, but not in a third (Li et al., 2003; Bose et al., 2004; Kunisaki et al., 2004). Disruption of the PSR gene in *C. elegans* showed a very slight inhibition of apoptotic cell engulfment (Wang et al., 2003). Unengulfed apoptotic cells were also observed in zebrafish during development (Hong et al., 2004). More recently, no engulfment defect or altered response to apoptotic cells was observed in a fibroblast line established from PSR-deficient mice (Mitchell et al., 2006).

An additional issue in understanding PSR function has been disagreement regarding the localization of the PSR protein. Original reports indicated a potential transmembrane domain in the protein (Fadok et al., 2000). PSR also contains a region of homology to a jumonji C (JmjC) domain that has been implicated in modifying nuclear proteins (Ayoub et al., 2003). A fusion protein of mammalian PSR to GFP was shown to localize to the nucleus of cells (Cui et al., 2004; Mitchell et al., 2006). *Hydra* PSR is also localized to the nucleus and has a JmjC domain with similarity to a 2-oxoglutarate and Fe (II)-dependent oxygenase factor inhibiting hypoxia-inducible factor (FIH) (Cikala et al., 2004). These results suggest that the putative PSR resides in the nucleus, rather than acting as a cell surface receptor for apoptotic cells.

Given these conflicting results, we investigated the function of the highly conserved PSR homolog (dPSR) in *Drosophila*, to determine if we could find a role for dPSR in engulfment or in other developmental events. In the fly embryo, the majority of apoptotic cells are engulfed and degraded by circulating phagocytic

<sup>1</sup>Cutaneous Biology Research Center, Massachusetts General Hospital, 149 13th street, Charlestown, MA 02129, USA. <sup>2</sup>Developmental and Cell Biology Department, University of California, Irvine, 5205 McGaugh Hall, Irvine, CA 92697, USA.

\*Author for correspondence (e-mail: kristin.white@cbr2.mgh.harvard.edu)

hemocytes, referred to as macrophages (Tepass et al., 1994). Membrane proteins involved in the uptake of apoptotic cells have been identified in *Drosophila*. *croquemort*, a homolog of the mammalian scavenger receptor CD36, was identified as a hemocyte protein important for engulfment of apoptotic cells (Franc et al., 1999). *draper*, a homolog of the *ced-1* gene in *C. elegans*, has also been identified as a phagocyte protein important for apoptotic cell engulfment (Freeman et al., 2003; Manaka et al., 2004).

Through analysis of a mutant for *dPSR*, we determined that *dPSR* is not required for the engulfment of apoptotic cells by macrophages in the developing embryo. However, we have detected a role for *dPSR* in protection from apoptosis. We found that increased *dPSR* inhibited apoptosis, while flies that lack *dPSR* showed inappropriate apoptosis during eye development. This protection from apoptosis appears to involve suppression of the apoptosis regulator Head involution defective (*Hid*; also known as Wrinkled – FlyBase). In addition, activation of the c-Jun-NH<sub>2</sub> terminal kinase (JNK) pathway suppresses phenotypes caused by *dPSR* overexpression, suggesting that *dPSR* may act to suppress the JNK pathway. These results provide an alternative explanation for phenotypes observed in *PSR* knockouts in other model organisms.

## MATERIALS AND METHODS

### Fly stocks and cDNAs

*P(EP)561* was obtained from the Szeged Stock Center; *Srp-hemo-GAL4*, *UAS-src:EGFP* (*srp-hemo GFP*) flies were kindly provided by Katja Bruchner and Norbert Perrimon (Bruckner et al., 2004); *drone<sup>124</sup> FRT 2A/TM3* and *drone<sup>129</sup> FRT2A/TM3* were kindly provided by Andreas Bergmann (Xu et al., 2005). Other flies used in these studies were *SM1*, *GMR-hid/Sco*, *CyO 2X GMR-rpr/Sco* (Kurada and White, 1998), *GMR-grim* (Chen et al., 1996), *GMR-GAL4* (Freeman, 1996), *UAS-grim* (Wing et al., 1998), *UAS-hid* (Zhou et al., 1997), *hid<sup>05014</sup>/TM6B*, *GMR-hid* (Grether et al., 1995), *Df(3L)H99/TM3* (White et al., 1994) and *Puc-lacZ<sup>E69</sup>* (Martin-Blanco et al., 1998). All experiments were conducted at 25°C.

### Generation of UAS-PSR flies

The cDNA for *dPSR* (CG5383) was excised from cDNA clone LD25827 (Invitrogen) using *Bgl*II and *Xho*I, and ligated into the *Bgl*II and *Xho*I restriction sites in the multi-cloning region of the pPUAST vector. Transgenic flies were generated by the Transgenic Fly Core Facility of the Cutaneous Biology Research Center at Massachusetts General Hospital.

### Generation of *dPSR<sup>FM1</sup>* flies

The *P(EP)561* element was mobilized with  $\Delta 2-3$ . PCR mapping was performed to determine loss of *dPSR* using various primers. DNA was isolated from *dPSR<sup>FM1</sup>* homozygous flies for inverse PCR using the method described by E. J. Rehm on the Berkeley *Drosophila* Genome Project website (<http://www.fruitfly.org/about/methods/inverse.pcr.html>). Briefly, DNA was isolated, digested with *Sau*3A, and recircularized. The DNA was then amplified via PCR with primers PSR1: ATGGTGTCGTCATGTTGAG and PSR12: ACCATTGCCATCACCCAGAA. The resulting 450 bp band was cloned using the TA cloning kit (Invitrogen), and plasmids were sequenced. The breakpoint was determined to delete 627 bases of coding sequence from the initiator ATG and included some remaining P element. Primers designed to amplify DNA on the other side of the P-element insertion indicated that the sequence of the upstream gene remained intact.

### PSR:ECFP fusion vector construction

The cDNA encoding PSR was amplified with 5'-TCCAGATCT-ATGACGAGGAATTCAAGCTGCCC and 3'-AGCGTCGACGAGG-AACGGATGATCCGCCCATGGA primers and cloned into the *Bgl*II and *Xho*I sites of the pECFP-N1 vector (Clontech) to create a PSR:ECFP fusion. The PSR:ECFP was excised with *Bgl*II and *Nor*I and cloned into the *Bam*HI and *Nor*I sites of the pIE-1 vector (Novagen). S2 cells were transfected using 5 µg DNA and Cellfectin reagent (Invitrogen) in 1 ml serum-free Schneiders

S2 media (Gibco). After 3 days in complete media, the cells were stained with 5 µg/ml Hoechst 33342 (Molecular Probes) and visualized using fluorescence microscopy.

### Apoptosis and engulfment assays

Acridine Orange staining was done according to White et al. (White et al., 1994). To assess engulfment, embryos were fixed and apoptotic cells were visualized by staining with 7-aminoactinomycin D (Franc et al., 1999), or TUNEL (described below). The embryos were examined by confocal microscopy to visualize *srp-hemo GFP*-labeled hemocytes and the punctate 7-AAD- or TUNEL-labeled apoptotic nuclei. At least five single hemocytes from a minimum of eight embryos of each genotype were scored for engulfment from similar regions of age-matched *dPSR<sup>FM1</sup>* homozygous embryos. The phagocytic index was calculated as the mean number of corpses per hemocyte for each genotype.

### Immunohistochemistry

To assess pupal eye morphology, eye discs were taken from pupae at the indicated time after puparium formation at 25°C, dissected in 0.1 M sodium phosphate buffer (PB), and stained with a 1:20 dilution of mouse anti-Discs large antibody 4F3 (Developmental Studies Hybridoma Bank) overnight in PB with 0.1% Triton-X-100 (PBT) and 5% goat serum. The discs were washed three times in PBT for 10 minutes each, and then incubated with a 1:200 dilution of goat anti-mouse FITC conjugate (Jackson Immunochemicals) in PBT and 5% goat serum overnight at 4°C. The discs were washed three times for 10 minutes each and mounted using Fluormount-G (Southern Biotechnologies Associates). The discs were visualized by confocal microscopy.

Differentiation and proliferation in third instar eye discs were assayed by staining yw, *dPSR<sup>FM1</sup>*, or w; *GMR-GAL4/UAS-dPSR*; + third instar eye discs with anti-phosphohistone antibody (1:200, Upstate), and rat anti-ElaV antiserum (1:200, Developmental Studies Hybridoma Bank), followed by secondary antibodies, goat anti-mouse FITC conjugate (1:200, Molecular Probes) and goat anti-rat Alexa 568 conjugate (1:200, Molecular Probes). The discs were visualized by confocal microscopy.

### In situ hybridization

Fixed embryos were subjected to in situ hybridization using an antisense riboprobe specific to *dPSR*, and compared to a sense probe as described by Grether et al. (Grether et al., 1995).

### Reverse transcription PCR

Total RNA was isolated from 100 third instar larval eye discs of the indicated genotype. Equal amounts of total RNA were reverse transcribed using an oligo dT primer and MMLV reverse transcriptase (Ambion). The cDNA encoding *dPSR* was then amplified using Platinum Taq (Invitrogen) with primers PSRF (5'-ATCCACATTGATCCACTGGG-3') and PSRR (5'-AGCTTGAATTGCTGGAGCTG-3').

### TUNEL labeling

Cell death in embryos was assayed using the In Situ Cell Death Detection Kit, TMR red (Roche). Embryos were dechorionated and fixed at the interface of heptane and 4% formaldehyde for 20 minutes, and then devitellinized with methanol for 2 minutes. Embryos were washed once with methanol, twice with ethanol (2 minutes each), and incubated in 70% ethanol overnight at -20°C. The embryos were washed with 30% ethanol for 10 minutes and twice with PBS for 10 minutes each, and then permeabilized with 0.3% Triton X-100 for 20 minutes and incubated in PBS + 0.1% Triton X-100 (PBST) with 1:1000 anti-GFP antibody (Invitrogen) overnight at 4°C. The embryos were washed three times in PBST for 10 minutes each, and incubated with secondary antibody (Alexa 488-conjugated donkey anti-rabbit antibody, Molecular Probes), in 50 µl TUNEL labeling mix/enzyme solution, overnight at 4°C. The embryos were washed three times in PBST for 10 minutes, mounted in Fluormount, and visualized with confocal microscopy. To assure that TUNEL signal was specific to apoptotic cells, H99 homozygous embryos that lack cell death were analyzed and found to lack TUNEL staining.

Pupal eye discs were dissected at 49 hours after pupation, fixed in 4% formaldehyde in PBS for 20 minutes, and stained as described for anti-Discs large. The TUNEL reaction was carried out for 2 hours at 37°C. The Alexa 488-conjugated goat anti-mouse secondary antibody was added directly to the TUNEL labeling solution. The discs were then washed three times in PBST, mounted with Fluormount and visualized under confocal microscopy.

## RESULTS

To identify genes involved in apoptotic cell engulfment we stained embryos with Acridine Orange (AO). Apoptotic cells can be visualized by AO, and can be seen to cluster in embryos, because of engulfment by macrophages (Abrams et al., 1993). In wild-type embryos, clustering of AO-positive cells can be observed in the anterior and posterior, and along the nervous system (Fig. 1A). We screened a collection of genomic deletions for a lack of apoptotic cell clustering (N. Franc, C. Marion, B. Zhai, R.J.K. and K.W., unpublished). Decreased clustering could indicate a defect in phagocytic clearance, or could be due to problems in macrophage development or migration.

Our screens identified several genomic regions with possible defects in engulfment. Embryos homozygous for *Df(3R)5C1* contained numerous unclustered AO-positive cells (Fig. 1B). Interestingly, this deletion includes the gene encoding the *Drosophila* homolog of the putative phosphatidylserine receptor, *dPSR* (Fadok et al., 2000). The predicted *Drosophila* gene encodes a 408 amino acid protein that is 70% identical and 82% similar to the human gene, with conservation extending throughout the gene (data not shown). This prompted us to further examine the role of this gene in engulfment. We generated *dPSR* mutants by P-element excision of EP(561), a P-element insertion 101 bp 5' of *dPSR* (Fig. 1D). Five imprecise excision mutants of *dPSR* were generated. The strain *dPSR<sup>FM1</sup>* was found to be a deletion that removed sequence from the P-element insertion into the gene, deleting the coding sequence for the first 210 amino acids of *dPSR*, while a portion of the P element and the upstream gene remained (Fig. 1D).

Homozygous *dPSR<sup>FM1</sup>* flies were viable and fertile with no obvious morphological defects and were established as a homozygous line for further analysis. We found that *dPSR* is ubiquitously expressed in wild-type embryos, but not expressed in *dPSR<sup>FM1</sup>* embryos (see Fig. S1A,B in the supplementary material), indicating that *dPSR<sup>FM1</sup>* is likely to be a null mutation. In addition, no expression of *dPSR* could be detected by RT-PCR in eye discs from third instar *dPSR<sup>FM1</sup>* larvae, whereas *dPSR* was expressed in control eye discs (see Fig. S1C in the supplementary material).

### PSR is not important for apoptotic cell engulfment

To determine the requirement for *dPSR* in apoptotic cell engulfment, we examined *dPSR<sup>FM1</sup>* embryos by AO staining and found that the numbers and pattern of clustered apoptotic cells was similar to those seen in wild-type flies (Fig. 1C). This indicates that the AO-positive cell clustering phenotype detected in the *Df(3R)5C1* embryos is not due to deletion of the *dPSR* gene alone.

To quantify apoptotic cell engulfment in wild-type and mutant embryos, we analyzed the number of apoptotic cells per macrophage using *srp hemo-GAL4*, *UAS-src-EGFP* (*Srp-hemo GFP*). In these animals, GFP is expressed specifically in macrophages (Bruckner et al., 2004). The number of GFP-labeled macrophages and apoptotic cells was similar in wild-type and *dPSR<sup>FM1</sup>* embryos (see Fig. S2 in the supplementary material). We counted the number of engulfed cell corpses, marked by 7-aminoactinomycin D or TUNEL staining,

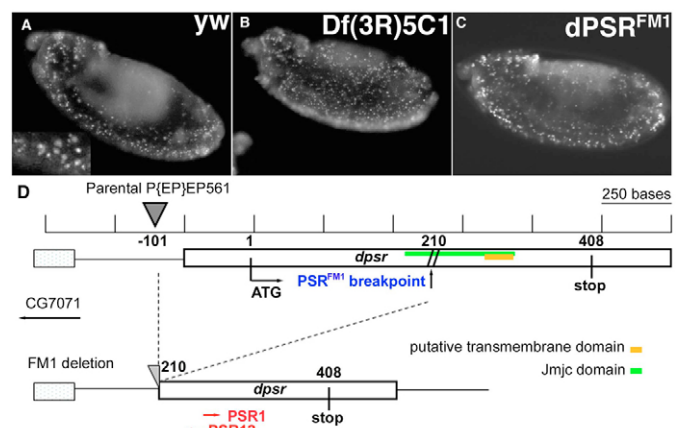

**Fig. 1. Cell death in *Drosophila* embryos that lack *dPSR*.** Embryos from flies containing previously identified genomic deletions were screened by Acridine Orange at 8-10 hours of development. (A) In *yw* control embryos, apoptotic cells were observed to cluster together because of their engulfment by hemocytes. The inset shows a higher magnification image to illustrate clustering. (B) A lack of apoptotic cell clustering was observed in embryos homozygous for *Df(3R)5C1*, *ry<sup>506</sup>*. (C) *dPSR* null embryos have clustered AO-stained cells. (D) The genomic region of *dPSR* is shown. The gray arrowhead indicates the location of the P-element insertion. The dashed lines indicate the region deleted in *dPSR<sup>FM1</sup>*. The translation start and stop sites are indicated. The Jmjc domain and the putative transmembrane domain are indicated in green and orange, respectively. Primers PSR1 and PSR12 were used for inverse PCR and sequencing of the breakpoint. The remaining *dPSR* sequence does contain an ATG; however, it is located at the 3' end of the Jmjc homology and putative transmembrane regions.

in macrophages of similarly staged embryos. Importantly, we did not detect a decrease in apoptotic cell engulfment by macrophages in *dPSR<sup>FM1</sup>* embryos (Fig. 2A,B). These data indicate that *dPSR* is not required for apoptotic cell clearance by macrophages in the developing embryo.

### *Drosophila* PSR is a nuclear protein

If *Drosophila* PSR functions in macrophages to recognize dying cells, one would expect this protein to be localized to the cell surface. However, analysis of the sequence of *dPSR* using PSORT II predicts that *dPSR* is a nuclear protein (Nakai and Horton, 1999). This was consistent with reports that mammalian and *Hydra* PSR contain nuclear localization signals and significant homology to nuclear proteins (Cikala et al., 2004; Cui et al., 2004; Mitchell et al., 2006). To determine whether *Drosophila* PSR is localized to the nucleus, the sequence was fused to the N-terminus of ECFP and expressed in S2 cells under a constitutive promoter. ECFP alone was found throughout the cell (Fig. 3A), while PSR:ECFP was found to co-localize with the DNA stain Hoechst 33342 (Fig. 3B-D). These data indicated that *dPSR* is likely to be localized to the nucleus of *Drosophila* cells, and is unlikely to act as a cell surface receptor for apoptotic cells.

### A role for PSR in protection from cell death

In addition to its role in apoptotic cell recognition and engulfment, work on PSR in mammalian systems suggest that PSR is important for other processes such as proper development and TGF- $\beta$  release (Hoffmann et al., 2001; Bose et al., 2004). To explore the signaling pathways activated by PSR, we generated transgenic flies that



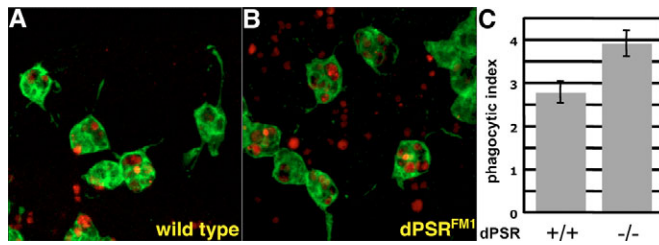

**Fig. 2. Macrophages of *Drosophila PSR<sup>FM1</sup>* embryos are competent to engulf apoptotic cells.** Macrophages are marked with GFP in embryos that are *srp-hemo-GAL-4, UAS-src-EGFP* or *srp-hemo-GAL-4, UAS-src-EGFP; dPSR<sup>FM1</sup>* (lacking both maternal and zygotic dPSR). Embryos (8–10 hours) were fixed, and the red apoptotic nuclei were observed after staining with 10  $\mu$ g/ml 7-aminoactinomycin D or TUNEL and visualized by confocal microscopy. (A) Wild-type macrophages (green) can be observed to contain engulfed TUNEL-labeled apoptotic cell nuclei (red). (B) Macrophages in homozygous *dPSR<sup>FM1</sup>* embryos also contain many apoptotic nuclei. (C) Engulfment was quantified as the mean number of phagocytosed apoptotic nuclei per macrophage (phagocytic index). The mean and standard error are shown. At least five macrophages from eight age-matched embryos per genotype were analyzed (total macrophages analyzed were 65 for wild type and 68 for *dPSR<sup>FM1</sup>*). Homozygous *dPSR<sup>FM1</sup>* embryos show a slight increase in apoptotic cell engulfment by macrophages, possibly owing to increased cell death.

expressed dPSR under control of the GAL4-UAS system (Brand and Perrimon, 1993). Expression of dPSR under two different ubiquitous promoters, Act5c-GAL4 and Tub-P-GAL4, resulted in a rotated male genital defect similar to that seen in mutants of the *hid* gene (Fig. 4A–C) (Abbott and Lengyel, 1991). *hid* is one of a cluster of genes important for regulating developmental apoptosis in the fly. Loss of *hid* results in semi-lethality, with adult escapers showing a rotated male genital phenotype and a lack of wing blade fusion resulting from lack of cell death (White et al., 1994). A genital rotation phenotype has also been observed in flies that express the baculovirus pan-caspase inhibitor p35, confirming a role for apoptosis in the correct orientation of the developing male genital disc (Macias et al., 2004). We also observed the rotation defect in

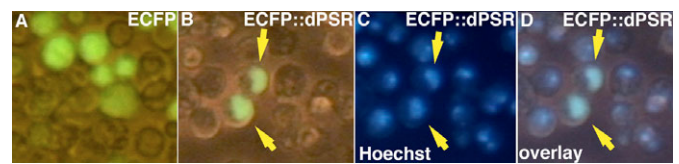

**Fig. 3. dPSR is localized in the nucleus of the cell in *Drosophila*.** (A) Expression of ECFP in S2 cells. ECFP fills the cytoplasm of the cell. (B) dPSR was fused to the N-terminal of ECFP and expressed in S2 cells. (C) PSR:ECFP cells stained with Hoechst 33342 and (D) the overlay of PSR-ECFP and Hoechst 33342 visualized by fluorescence microscopy. The yellow arrows indicate identical cells in each of panels B, C, D. PSR-ECFP co-localizes with the DNA dye Hoechst 33342.

flies that lack *dronc* (*Nc* – FlyBase), an initiator caspase (Fig. 4D) (Xu et al., 2005). This further indicates a role for cell death in this phenotype.

dPSR expression driven by the apterous driver resulted in a phenotype in the wing, ranging from a wavy wing, to a puffy wing that lacked wing blade fusion. This is another phenotype shared by *hid* and *dronc* mutants (Fig. 4F–I) (Abbott and Lengyel, 1991; Xu et al., 2005). These results suggest that dPSR overexpression inhibits Hid-dependent apoptosis in multiple *Drosophila* tissues.

To further test the hypothesis that dPSR can protect from apoptosis, we examined the effects of increasing or decreasing dPSR function on cell death induced by the overexpression of pro-apoptotic genes in the eye. If dPSR promotes cell survival in the eye, then increased dPSR should suppress apoptosis and loss of dPSR should enhance apoptosis. We co-expressed dPSR in the eye with the pro-apoptotic proteins Hid or Grim. Co-expression of dPSR suppressed the small rough eye induced by expression of Hid, resulting in an average increase in eye size of 19% ( $P=0.0002$ ). The rough eye induced by Grim was also suppressed when dPSR was co-expressed (Fig. 5A–D).

To determine whether loss of dPSR enhances death, we examined the effect of removing *dPSR* on Rpr-, Hid- or Grim-induced cell killing in the developing eye. We found that deletion of one copy of *dPSR* enhanced the rough eye of GMR-Rpr, GMR-Hid or GMR-

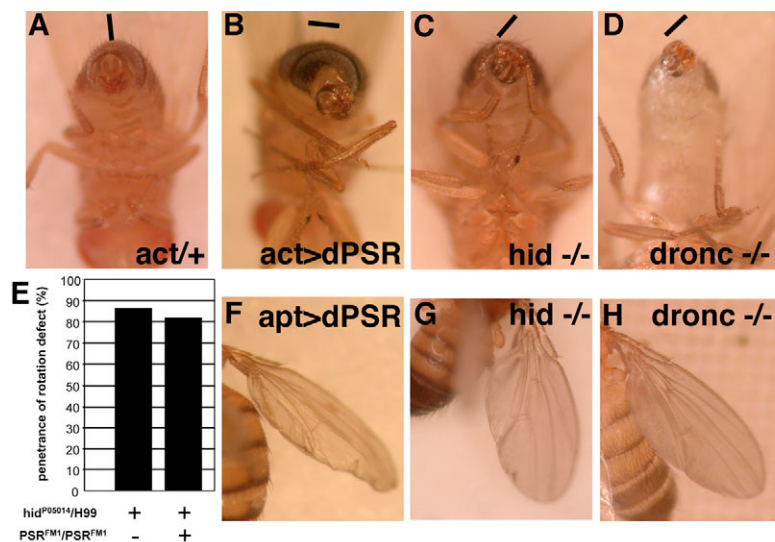

**Fig. 4. Overexpression of dPSR results in phenotypes similar to *hid* and *dronc* null flies.** Male flies of the genotype *w; act5C-GAL4/+* (A), *w; act5C-GAL4/UAS-dPSR* (B), *w; hid<sup>P05414</sup>/H99* (C), and *dronc<sup>124</sup>/dronc<sup>129</sup>* (D). The black lines above the fly indicate the alignment of the genitals. Rotated genitalia can be observed in flies that lack *hid* or *dronc* as well as those that overexpress dPSR ubiquitously. (E) The penetrance of the rotation defect was observed to be similar in *w; hid<sup>P05414</sup>/H99* compared to *w; hid<sup>P05414</sup>, dPSR<sup>FM1</sup>/H99*, *dPSR<sup>FM1</sup>* males ( $n=74$  and 61 males, respectively). (The penetrance of rotation in *act5C-GAL4/UAS-dPSR* flies was 54%,  $n=642$ , and 100% for *dronc<sup>124</sup>/dronc<sup>129</sup>* escapers,  $n=8$ .) (F–H) Expression of dPSR under control of the apterous driver resulted in wing phenotypes similar to those of *hid* and *dronc* mutants. (F) *w; apterous-GAL4/UAS-dPSR*, (G) *w; hid<sup>P05414</sup>/H99*, and (H) *dronc<sup>124</sup>/dronc<sup>129</sup>*. The ballooned wing phenotype (G,H) was observed in 39% and a wavy wing phenotype (F) was observed in 54% of 59 *apterous-GAL4/UAS-dPSR* flies analyzed. The ballooned wing phenotype was observed in 100% of eight *dronc<sup>124</sup>/dronc<sup>129</sup>* flies examined, and 100% of 20 *hid* flies.

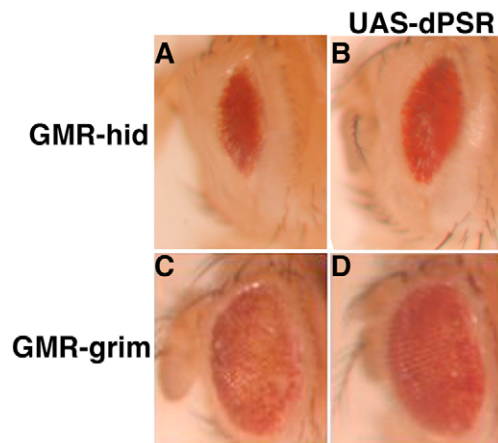

**Fig. 5. Expression of PSR suppresses *hid*- or *grim*-induced death in the eye.** *Drosophila* eyes are shown of (A) *w*; *GMR-GAL4/+*; *GMR-hid/+*, (B) *w*; *GMR-GAL4/UAS-dPSR*; *GMR-hid/+*, (C) *w*; *GMR-GAL4/+*; *UAS-grim/+* and (D) *w*; *GMR-GAL4/UAS-dPSR*; *UAS-grim/+*. GMR-Hid suppression by PSR was assessed in 20 randomly paired samples; average size increase by dPSR co-expression was 19% ( $P=0.0002$  in paired *t*-test analysis).

**Grim.** Loss of both copies of *dPSR* further enhanced this death (Fig. 6A-I). Taken together, these results suggest that the normal function of dPSR in the eye is to suppress cell death.

To determine whether dPSR was required to block apoptosis in the absence of exogenous stimuli, we examined the eye for altered apoptosis at various stages of development. There was no detectable alteration in apoptosis, as detected by TUNEL staining in third instar larval eye discs from *dPSR<sup>FM1</sup>* mutants or from larvae expressing dPSR under control of a GMR promoter (data not shown).

Proliferation and differentiation were also normal in these discs, as assessed by anti-phosphohistone and anti-Elav antibody staining, respectively (data not shown) (Robinow and White, 1991).

During pupal life, the characteristic hexagonal lattice structure of the adult eye is formed. The cells that make up each ommatidial unit can be observed using anti-Discs large, an antibody to a septate junction protein that labels cell membranes (Parnas et al., 2001). During the formation of the hexagonal lattice, many extra interommatidial cells undergo apoptosis, leaving 12 lattice cells per ommatidium (Brachmann and Cagan, 2003). The apoptosis of these extra cells and formation of the lattice is normally complete by 30 hours after puparium formation (APF) (Brachmann and Cagan, 2003). In wild-type pupal eye discs, a characteristic hexagonal lattice pattern of the secondary and tertiary pigment cells of the ommatidial clusters is observed (Fig. 7A). At 40 hours APF, pupal eye development was normal in the mutants and a characteristic hexagonal lattice of interommatidial cells was seen (Fig. 7D). By 50 hours APF we detected loss of interommatidial cells, which in some cases resulted in ommatidial fusions (Fig. 7B,C). The loss of cells was not uniform, as some parts of the eye discs appeared normal at this time. To determine if the loss of the lattice cells was due to apoptotic death of these cells, we performed TUNEL staining of eye discs at 49 hours APF. We observed TUNEL-stained nuclei below the plane of the lattice in mutant discs (Fig. 7I,J). In contrast to the loss of cells seen in the absence of *dPSR*, overexpression of dPSR in the eye led to the appearance of extra lattice cells (Fig. 7E). These data indicate that dPSR functions to regulate apoptosis during the pupal phase of eye development.

#### dPSR inhibits apoptosis upstream of *Hid*

To test directly whether the ectopic death seen in *dPSR* mutants was due to *Hid*-dependent apoptosis, we examined the effect of loss of *hid* on the *dPSR<sup>FM1</sup>* pupal eye phenotype. We found that the absence of both *hid* and *dPSR* resulted in extra interommatidial cells, similar

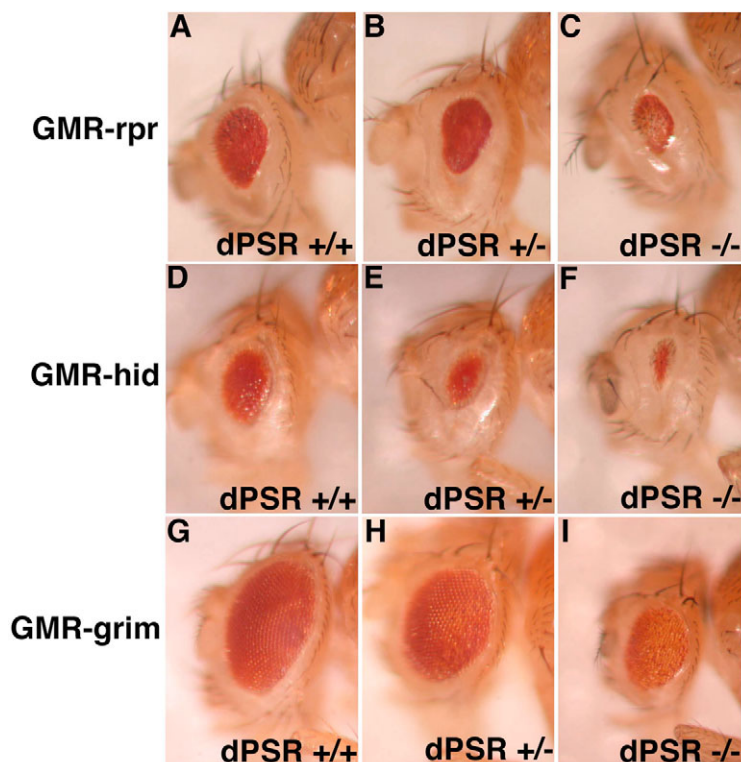

**Fig. 6. Loss of *dPSR* enhances *Rpr*, *Hid* and *Grim* killing in the *Drosophila* eye.** Male eyes are shown for (A) *CyO*, 2 copies *GMR-rpr/+*, (B) *CyO*, 2 copies *GMR-rpr/+*; *PSR<sup>FM1</sup>/+*, (C) *CyO*, 2 copies *GMR-rpr/+*; *PSR<sup>FM1</sup>/PSR<sup>FM1</sup>*, (D) *SM1*, *GMR-hid/+*, (E) *SM1*, *GMR-hid/+*; *PSR<sup>FM1</sup>/+*, (F) *SM1*, *GMR-hid/+*; *PSR<sup>FM1</sup>/PSR<sup>FM1</sup>*, (G) *w*; *GMR-grim/+*, (H) *w*; *GMR-grim/+*; *PSR<sup>FM1</sup>/+* and (I) *w*; *GMR-grim/+*; *PSR<sup>FM1</sup>/PSR<sup>FM1</sup>*. Removing one copy of dPSR (B,E,H) enhances the small or rough phenotype caused by expressing cell death inducers in the eye. Removing both copies of dPSR (C,F,I) further enhances the rough eye phenotype.



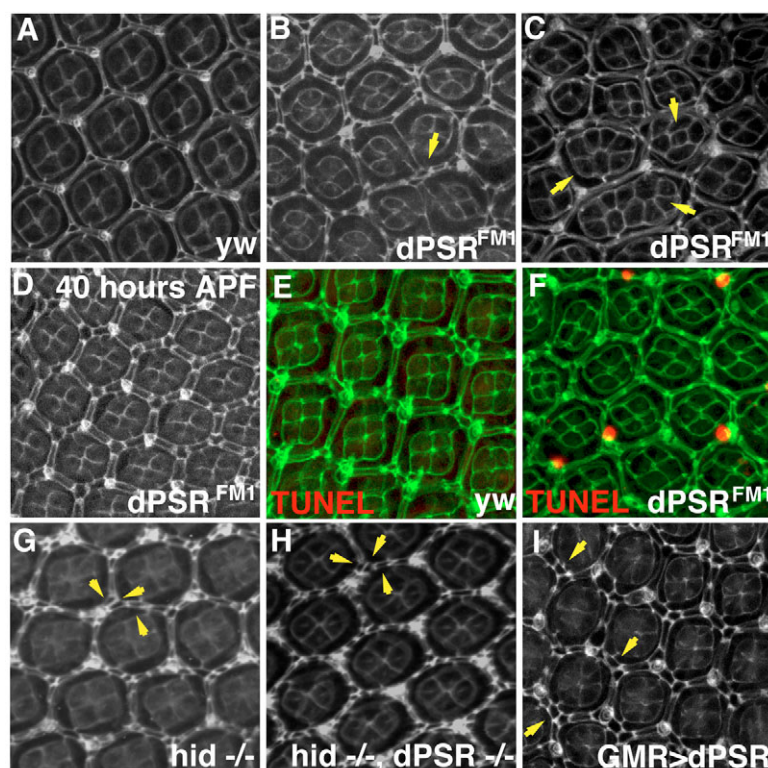

**Fig. 7. Changes in dPSR levels can alter the number of interommatidial cells late in pupal eye development.**

*Drosophila* eye discs were dissected and stained with an antibody to Discs large to visualize the membranes of the cone cells and primary pigment cells and the hexagonal lattice of secondary and tertiary pigment cells and bristle cells. Fifty hour APF eye discs from (A) *yw* control or (B,C) *dPSR<sup>FM1</sup>*. *dPSR<sup>FM1</sup>* mutant discs show ommatidial fusions and disorganization, indicated by arrows. (D) *dPSR<sup>FM1</sup>* at 40 hour APF appear normal, indicating that the defects seen at 50 hours are likely to be due to cell loss. Apoptosis of interommatidial cells was visualized by TUNEL. (E,F) TUNEL-labeled nuclei (red) are seen at 49 hours APF in *dPSR<sup>FM1</sup>* eye discs (F), but not in *yw* discs (E). Lack of *hid* suppresses the *dPSR<sup>FM1</sup>* phenotype as observed in *w; hid<sup>05014</sup>*, *dPSR<sup>FM1</sup>/H99*, *dPSR<sup>FM1</sup>* (G), and results in extra interommatidial cells, indicated by arrows, similar to *w; hid<sup>05014</sup>/H99* eyes that lack *hid* alone (H). Overexpression of dPSR results in extra interommatidial cells. These are indicated with arrows in *w; GMR-GAL4/UAS-dPSR* (I).

to that seen in the absence of *hid* alone (Kurada and White, 1998) (Fig. 7F,G). These results indicate that the increased apoptosis in dPSR-null eyes is due to Hid-dependent apoptosis.

dPSR and *hid* have opposite effects on apoptosis. To determine if dPSR acted genetically downstream of *hid*, we tested whether loss of dPSR could modify the *hid* genital phenotype. Flies that lack both *hid* and dPSR displayed a penetrance of the rotated genital phenotype similar to flies that lack *hid* alone (Fig. 4E). These data indicate that dPSR is unlikely to act downstream of *hid* to regulate cell death. Taken together, our epistasis analysis in both the eye and genitals suggest that dPSR functions to suppress Hid activity and thus promote cell survival.

#### dPSR inhibits apoptosis upstream of JNK activity

The JNK pathway has previously been shown to regulate Hid activity and apoptosis during development (Moreno et al., 2002). The JNK pathway has also been shown to be important for the proper rotation of the developing male genitalia, a process that requires apoptosis (Macias et al., 2004). Increasing JNK activity by removing one copy of its negative regulator, Puckered (Puc), suppresses a genital rotation defect observed in males heterozygous for the *H99* deletion, which deletes *hid*, *grim* and *rpr* (Macias et al., 2004). Inhibition of JNK by overexpression of Puc can also induce rotated genitalia (Macias et al., 2004). These data support the model that decreased JNK activity suppresses Hid activity, resulting in similar rotation defects to those seen in *hid* mutants.

To determine whether the JNK pathway has a role in the rotated genital phenotype induced by dPSR expression, we examined the effect of loss of one copy of *puc* on the dPSR overexpression phenotype. Loss of one copy of *puc* almost completely suppressed the rotated genital phenotype resulting from increased dPSR. The mis-rotation phenotype was seen in 52% (336/642) of dPSR-overexpressing flies, but in only 1.6% (8/496) of flies that

overexpress dPSR but have one copy of *puc* disrupted (Fig. 8A). Thus, the dPSR anti-apoptotic effects are counteracted by increasing JNK pathway activity, suggesting that dPSR may suppress Hid activity by suppressing the JNK pathway (Fig. 8B).

#### DISCUSSION

We have examined the function of the *Drosophila* homolog of the putative phosphatidylserine receptor. Our data indicate that this protein is not required for apoptotic cell engulfment by macrophages in the *Drosophila* embryo, but rather functions to suppress apoptosis. We have considered how these findings can be interpreted in light of the diverse data on the function of PSR in other organisms.

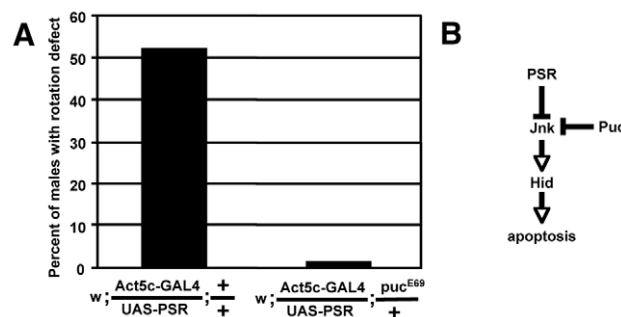

**Fig. 8. The dPSR-induced genital rotation defect is suppressed through the JNK pathway in *Drosophila*.**

(A) The penetrance of the rotation defect caused by expression of dPSR was suppressed by removing one copy of *puc* observed in *w; UAS-dPSR/act5c-GAL4* or *w; UAS-dPSR/act5c-GAL4; puc<sup>E69lacZ</sup>/+* flies (observed percentage of 642 and 496 males analyzed, respectively). (B) The pathway through which dPSR may act to inhibit cell death.

### PSR may not be involved in engulfment

In addition to the original cell-based studies supporting a role for PSR in engulfment, gene ablation experiments in a variety of models also provide some evidence for a role for PSR in this process. PSR gene ablation in *C. elegans* resulted in a delay in the engulfment of apoptotic cells, as evidenced by the presence of more cell corpses in the mutant animals (Wang et al., 2003). In two of the three reported murine PSR gene-knockout models, defects in apoptotic cell engulfment were reported (Li et al., 2003; Kunisaki et al., 2004).

We found no evidence for a role of dPSR in engulfment in *Drosophila*. Evidence against a role for PSR in engulfment also comes from two other knockout models and from data on the localization of the protein. One of the reported mouse knockouts showed no difference in engulfment of apoptotic cells by macrophages in the mutant, although PSR<sup>-/-</sup> macrophages were generally inhibited in their release of pro- and anti-inflammatory cytokines (Bose et al., 2004). In addition, fibroblast lines established from PSR<sup>-/-</sup> embryos showed no defect in apoptotic cell engulfment or in their response to apoptotic cells (Mitchell et al., 2006). Zebrafish lacking PSR accumulated dead cells, but were not definitively shown to have defects in apoptotic cell engulfment (Hong et al., 2004). Finally, localization data from our work and from a number of labs strongly supports a nuclear localization for the protein (Ayoub et al., 2003; Cui et al., 2004; Mitchell et al., 2006). This is not consistent with a role for PSR as a surface receptor for the recognition for apoptotic cells, although PS could theoretically modulate the activity of this protein within the cell.

### PSR could be required for cell differentiation and survival

Our observations support a role for dPSR in cell survival. In zebrafish, reduction of PSR resulted in an increase in the number of apoptotic cells present during development (Hong et al., 2004). In particular, the brains of these fish were shrunken and had an increase in apoptotic cells. In two of the mouse knockout models an increase in apoptotic cells was detected (Li et al., 2003; Kunisaki et al., 2004). However, all three knockouts resulted in perinatal lethality, with defects in differentiation in a variety of tissues (Li et al., 2003; Bose et al., 2004; Kunisaki et al., 2004). We speculate that defects in engulfment detected in some of the gene ablation models could reflect a role for PSR in the proper differentiation of macrophages. Increased apoptosis seen in our studies and by others might also be due to defects in proper differentiation in the absence of PSR.

What insight can be gained from our studies into the function of dPSR in differentiation and cell survival? We have shown that increased dPSR results in a cell survival phenotype that is suppressed by activation of the JNK pathway, while loss of dPSR results in apoptosis, activated by the cell death regulator Hid, a known target of JNK activation in apoptosis (McEwen and Peifer, 2005). Taken together, these data suggest that dPSR may normally act to suppress JNK activation of Hid-induced apoptosis.

JNK activation is important for many processes in cells, including cell death, proliferation and differentiation. A role for JNK in apoptosis was found in many mammalian cell types (Yang et al., 1997; Dong et al., 1998; Tournier et al., 2000). Data from mouse knockouts of JNK also suggest a role for JNK in proliferation and differentiation (Dong et al., 1998; Tournier et al., 2000). In addition, JNK activation in dying cells is required for proliferative signals originating from apoptotic cells in *Drosophila* (Ryoo et al., 2004). Interestingly, defects in proliferation and differentiation of many tissues were observed in mice that lack PSR (Li et al., 2003; Bose et

al., 2004; Kunisaki et al., 2004). Taken together with our observations of increased cell death in dPSR mutant flies, these observations suggest that some of the phenotypes seen in mouse and fish models of PSR gene ablation might be due to inappropriate activation of the JNK pathway.

### Role of PSR in *Drosophila* development

Based on our genetic assays, we propose that one function of dPSR is to suppress Hid activation. Flies that lack dPSR show increased apoptosis in the developing pupal eye, which is suppressed in the absence of *hid*, while overexpression of dPSR results in ectopic cell survival. Hid function is required for the death of the interommatidial cells in the pupal retina (Kurada and White, 1998). Our results also showed that expression of dPSR can inhibit death induced by the expression of Hid or Grim in the eye, and that loss of dPSR enhances Rpr-, Hid- or Grim-induced death in the eye. Interestingly, loss of one copy of *hid* can also suppress cell death induced by Rpr or Hid expression in the eye (Bergmann et al., 1998; Kurada and White, 1998). Therefore alterations of dPSR levels in the eye may be altering Hid activity to modify the Grim- and Rpr-induced eye phenotypes.

JNK activation has been shown to increase hid activity (McEwen and Peifer, 2005). However, Hid activity is also modulated by activation of the Ras/Erk pathway (Bergmann et al., 1998; Kurada and White, 1998). Ras activation results in the survival of ectopic interommatidial cells, through the downregulation of Hid activity (Miller and Cagan, 1998). Ectopic Ras activation also results in genital rotation defects, similar to those seen with dPSR overexpression (Macias et al., 2004). This suggests that PSR overexpression might activate the Ras/Erk pathway. Based on our data, it is not clear whether dPSR might activate Ras and thus suppress JNK activity, whether dPSR could suppress JNK and thus activate Ras, or whether dPSR might act independently in an opposing manner on the JNK and Ras pathways.

By examining the function of dPSR in the *Drosophila* system, we have provided new insight into the controversy regarding this protein. Although we do not find evidence that this protein plays a role in engulfment, we have found that it is important in cell survival. This is consistent with phenotypes seen in gene ablation models in other organisms. Furthermore, we have shown that dPSR affects the JNK pathway, and this may provide a clue as to its diverse functions in mammals.

We would like to thank Jie Chen for assistance with confocal microscopy; Katia Bruckner and Nobert Perrimon for Srp-hemo GFP; Andreas Bergmann for the dronc alleles; and Robert Page for advice on statistics. This research is supported by NIH grant GM69541 to Kristin White and an NRSA GM068256 to Ronald Krieser. Carrie Brachmann is supported in part by a Career Award in the Biomedical Sciences from the Burroughs Wellcome Fund.

### Supplementary material

Supplementary material for this article is available at <http://dev.biologists.org/cgi/content/full/134/13/2407/DC1>

### References

- Abbott, M. K. and Lengyel, J. A. (1991). Embryonic head involution and rotation of male terminalia require the *Drosophila* locus head involution defective. *Genetics* **129**, 783-789.
- Abrams, J. M., White, K., Fessler, L. I. and Steller, H. (1993). Programmed cell death during *Drosophila* embryogenesis. *Development* **117**, 29-43.
- Arur, S., Uche, U. E., Rezaul, K., Fong, M., Scranton, V., Cowan, A. E., Mohler, W. and Han, D. K. (2003). Annexin I is an endogenous ligand that mediates apoptotic cell engulfment. *Dev. Cell* **4**, 587-598.
- Ayoub, N., Noma, K., Isaac, S., Kahan, T., Grewal, S. I. and Cohen, A. (2003). A novel jmjC domain protein modulates heterochromatization in fission yeast. *Mol. Cell. Biol.* **23**, 4356-4370.
- Bergmann, A., Agapite, J., McCall, K. and Steller, H. (1998). The *Drosophila*

- gene hid is a direct molecular target of ras-dependent survival signaling. *Cell* **95**, 331-341.
- Bose, J., Gruber, A. D., Helming, L., Schiebe, S., Wegener, I., Hafner, M., Beales, M., Kontgen, F. and Lengeling, A. (2004). The phosphatidylserine receptor has essential functions during embryogenesis but not in apoptotic cell removal. *J. Biol.* **3**, 15.
- Brachmann, C. B. and Cagan, R. L. (2003). Patterning the fly eye: the role of apoptosis. *Trends Genet.* **19**, 91-96.
- Brand, A. H. and Perrimon, N. (1993). Targeted gene expression as a means of altering cell fates and generating dominant phenotypes. *Development* **118**, 401-415.
- Brown, S., Heinisch, I., Ross, E., Shaw, K., Buckley, C. D. and Savill, J. (2002). Apoptosis disables CD31-mediated cell detachment from phagocytes promoting binding and engulfment. *Nature* **418**, 200-203.
- Bruckner, K., Kockel, L., Duchek, P., Luque, C. M., Rorth, P. and Perrimon, N. (2004). The PDGF/VEGF receptor controls blood cell survival in Drosophila. *Dev. Cell* **7**, 73-84.
- Chen, P., Nordstrom, W., Gish, B. and Abrams, J. M. (1996). grim, a novel cell death gene in Drosophila. *Genes Dev.* **10**, 1773-1782.
- Cikala, M., Alexandrova, O., David, C. N., Proschel, M., Stiening, B., Cramer, P. and Bottger, A. (2004). The phosphatidylserine receptor from Hydra is a nuclear protein with potential Fe(II) dependent oxygenase activity. *BMC Cell Biol.* **5**, 26.
- Cui, P., Qin, B., Liu, N., Pan, G. and Pei, D. (2004). Nuclear localization of the phosphatidylserine receptor protein via multiple nuclear localization signals. *Exp. Cell Res.* **293**, 154-163.
- Dong, C., Yang, D. D., Wysk, M., Whitmarsh, A. J., Davis, R. J. and Flavell, R. A. (1998). Defective T cell differentiation in the absence of Jnk1. *Science* **282**, 2092-2095.
- Fadok, V. A., Bratton, D. L., Frasch, S. C., Warner, M. L. and Henson, P. M. (1998). The role of phosphatidylserine in recognition of apoptotic cells by phagocytes. *Cell Death Differ.* **5**, 551-562.
- Fadok, V. A., Bratton, D. L., Rose, D. M., Pearson, A., Ezekowitz, R. A. and Henson, P. M. (2000). A receptor for phosphatidylserine-specific clearance of apoptotic cells. *Nature* **405**, 85-90.
- Franc, N. C., Heitzler, P., Ezekowitz, R. A. and White, K. (1999). Requirement for croquemort in phagocytosis of apoptotic cells in Drosophila. *Science* **284**, 1991-1994.
- Freeman, M. (1996). Repetitive use of the EGF receptor triggers differentiation of all cell types in the Drosophila eye. *Cell* **87**, 651-660.
- Freeman, M. R., Delrow, J., Kim, J., Johnson, E. and Doe, C. Q. (2003). Unwrapping glial biology: Gcm target genes regulating glial development, diversification, and function. *Neuron* **38**, 567-580.
- Grether, M. E., Abrams, J. M., Agapite, J., White, K. and Steller, H. (1995). The head involution defective gene of Drosophila melanogaster functions in programmed cell death. *Genes Dev.* **9**, 1694-1708.
- Hanayama, R., Tanaka, M., Miwa, K., Shinohara, A., Iwamatsu, A. and Nagata, S. (2002). Identification of a factor that links apoptotic cells to phagocytes. *Nature* **417**, 182-187.
- Hanayama, R., Tanaka, M., Miwa, K. and Nagata, S. (2004). Expression of developmental endothelial locus-1 in a subset of macrophages for engulfment of apoptotic cells. *J. Immunol.* **172**, 3876-3882.
- Hoffmann, P. R., deCathelineau, A. M., Ogden, C. A., Leverrier, Y., Bratton, D. L., Daleke, D. L., Ridley, A. J., Fadok, V. A. and Henson, P. M. (2001). Phosphatidylserine (PS) induces PS receptor-mediated macropinocytosis and promotes clearance of apoptotic cells. *J. Cell Biol.* **155**, 649-659.
- Hong, J. R., Lin, G. H., Lin, C. J., Wang, W. P., Lee, C. C., Lin, T. L. and Wu, J. L. (2004). Phosphatidylserine receptor is required for the engulfment of dead apoptotic cells and for normal embryonic development in zebrafish. *Development* **131**, 5417-5427.
- Huynh, M. L., Fadok, V. A. and Henson, P. M. (2002). Phosphatidylserine-dependent ingestion of apoptotic cells promotes TGF-beta1 secretion and the resolution of inflammation. *J. Clin. Invest.* **109**, 41-50.
- Kunisaki, Y., Masuko, S., Noda, M., Inayoshi, A., Sanui, T., Harada, M., Sasazuki, T. and Fukui, Y. (2004). Defective fetal liver erythropoiesis and T lymphopoiesis in mice lacking the phosphatidylserine receptor. *Blood* **103**, 3362-3364.
- Kurada, P. and White, K. (1998). Ras promotes cell survival in Drosophila by downregulating hid expression. *Cell* **95**, 319-329.
- Li, M. O., Sarkisian, M. R., Mehal, W. Z., Rakic, P. and Flavell, R. A. (2003). Phosphatidylserine receptor is required for clearance of apoptotic cells. *Science* **302**, 1560-1563.
- Macias, A., Romero, N. M., Martin, F., Suarez, L., Rosa, A. L. and Morata, G. (2004). PVF1/PVR signaling and apoptosis promotes the rotation and dorsal closure of the Drosophila male terminalia. *Int. J. Dev. Biol.* **48**, 1087-1094.
- Manaka, J., Kuraishi, T., Shiratsuchi, A., Nakai, Y., Higashida, H., Henson, P. and Nakanishi, Y. (2004). Draper-mediated and phosphatidylserine-independent phagocytosis of apoptotic cells by Drosophila hemocytes/macrophages. *J. Biol. Chem.* **279**, 48466-48476.
- Martin-Blanco, E., Gampel, A., Ring, J., Virdee, K., Kirov, N., Tolkovsky, A. M. and Martinez-Arias, A. (1998). puckered encodes a phosphatase that mediates a feedback loop regulating JNK activity during dorsal closure in Drosophila. *Genes Dev.* **12**, 557-570.
- McEwen, D. G. and Peifer, M. (2005). Puckered, a Drosophila MAPK phosphatase, ensures cell viability by antagonizing JNK-induced apoptosis. *Development* **132**, 3935-3946.
- Miller, D. T. and Cagan, R. L. (1998). Local induction of patterning and programmed cell death in the developing Drosophila retina. *Development* **125**, 2327-2335.
- Mitchell, J. E., Cvetanovic, M., Tibrewal, N., Patel, V., Colamonici, O. R., Li, M. O., Flavell, R. A., Levine, J. S., Birge, R. B. and Ucker, D. S. (2006). The presumptive phosphatidylserine receptor is dispensable for innate anti-inflammatory recognition and clearance of apoptotic cells. *J. Biol. Chem.* **281**, 5718-5725.
- Moreno, E., Yan, M. and Basler, K. (2002). Evolution of TNF signaling mechanisms: JNK-dependent apoptosis triggered by Eiger, the Drosophila homolog of the TNF superfamily. *Curr. Biol.* **12**, 1263-1268.
- Nakai, K. and Horton, P. (1999). PSORT: a program for detecting sorting signals in proteins and predicting their subcellular localization. *Trends Biochem. Sci.* **24**, 34-36.
- Parnas, D., Haghighi, A. P., Fetter, R. D., Kim, S. W. and Goodman, C. S. (2001). Regulation of postsynaptic structure and protein localization by the Rho-type guanine nucleotide exchange factor dPix. *Neuron* **32**, 415-424.
- Robinow, S. and White, K. (1991). Characterization and spatial distribution of the ELAV protein during Drosophila melanogaster development. *J. Neurobiol.* **22**, 443-461.
- Ryoo, H. D., Gorenc, T. and Steller, H. (2004). Apoptotic cells can induce compensatory cell proliferation through the JNK and the Wingless signaling pathways. *Dev. Cell* **7**, 491-501.
- Schlegel, R. A. and Williamson, P. (2001). Phosphatidylserine, a death knell. *Cell Death Differ.* **8**, 551-563.
- Scott, R. S., McMahon, E. J., Pop, S. M., Reap, E. A., Caricchio, R., Cohen, P. L., Earp, H. S. and Matsushima, G. K. (2001). Phagocytosis and clearance of apoptotic cells is mediated by MER. *Nature* **411**, 207-211.
- Tepass, U., Fessler, L. I., Aziz, A. and Hartenstein, V. (1994). Embryonic origin of hemocytes and their relationship to cell death in Drosophila. *Development* **120**, 1829-1837.
- Tournier, C., Hess, P., Yang, D. D., Xu, J., Turner, T. K., Nimnual, A., Bar-Sagi, D., Jones, S. N., Flavell, R. A. and Davis, R. J. (2000). Requirement of JNK for stress-induced activation of the cytochrome c-mediated death pathway. *Science* **288**, 870-874.
- van den Eijnde, S. M., Boshart, L., Baehrecke, E. H., De Zeeuw, C. I., Reutelingsperger, C. P. and Vermeij-Keers, C. (1998). Cell surface exposure of phosphatidylserine during apoptosis is phylogenetically conserved. *Apoptosis* **3**, 9-16.
- Verhoven, B., Schlegel, R. A. and Williamson, P. (1995). Mechanisms of phosphatidylserine exposure, a phagocyte recognition signal, on apoptotic T lymphocytes. *J. Exp. Med.* **182**, 1597-1601.
- Vermes, I., Haanen, C., Steffens-Nakken, H. and Reutelingsperger, C. (1995). A novel assay for apoptosis. Flow cytometric detection of phosphatidylserine expression on early apoptotic cells using fluorescein labelled Annexin V. *J. Immunol. Methods* **184**, 39-51.
- Wang, X., Wu, Y. C., Fadok, V. A., Lee, M. C., Gengyo-Ando, K., Cheng, L. C., Ledwith, D., Hsu, P. K., Chen, J. Y., Chou, B. K. et al. (2003). Cell corpse engulfment mediated by C. elegans phosphatidylserine receptor through CED-5 and CED-12. *Science* **302**, 1563-1566.
- White, K., Grether, M. E., Abrams, J. M., Young, L., Farrell, K. and Steller, H. (1994). Genetic control of programmed cell death in Drosophila. *Science* **264**, 677-683.
- Wing, J. P., Zhou, L., Schwartz, L. M. and Nambu, J. R. (1998). Distinct cell killing properties of the Drosophila reaper, head involution defective, and grim genes. *Cell Death Differ.* **5**, 930-939.
- Xu, D., Li, Y., Arcaro, M., Lackey, M. and Bergmann, A. (2005). The CARD-carrying caspase Dronc is essential for most, but not all developmental cell death in Drosophila. *Development* **132**, 2125-2134.
- Yang, D. D., Kuan, C. Y., Whitmarsh, A. J., Rincon, M., Zheng, T. S., Davis, R. J., Rakic, P. and Flavell, R. A. (1997). Absence of excitotoxicity-induced apoptosis in the hippocampus of mice lacking the Jnk3 gene. *Nature* **389**, 865-870.
- Zhou, L., Schnitzler, A., Agapite, J., Schwartz, L. M., Steller, H. and Nambu, J. R. (1997). Cooperative functions of the reaper and head involution defective genes in the programmed cell death of Drosophila central nervous system midline cells. *Proc. Natl. Acad. Sci. USA* **94**, 5131-5136.
